## Energy costs of blood digestion in a host-specific haematophagous parasite

Michal Sarfati<sup>1,2</sup>, Boris R. Krasnov<sup>1,\*</sup>, Lusine Ghazaryan<sup>1,2</sup>, Irina S. Khokhlova<sup>3</sup>, Laura J. Fielden<sup>4</sup>  
and A. Allan Degen<sup>3</sup>

<sup>1</sup>Ramon Science Center and Mitrani Department of Desert Ecology, Jacob Blaustein Institutes for Desert Research, Ben-Gurion University of the Negev, Mizpe Ramon 80600, Israel, <sup>2</sup>Albert Katz International School for Desert Studies, Jacob Blaustein Institutes for Desert Research, Ben-Gurion University of the Negev, Sede Boqer Campus, Israel, <sup>3</sup>Desert Animal Adaptations and Husbandry, Wyler Department of Dryland Agriculture, Jacob Blaustein Institutes for Desert Research, Ben-Gurion University of the Negev, Beer Sheva 84105, Israel and <sup>4</sup>Science Division, Truman State University, Kirksville, MO 63501, USA

\*Author for correspondence (e-mail: krasnov@bgumail.bgu.ac.il)

Accepted 4 May 2005

### Summary

Fleas consume and digest blood from their hosts. We hypothesized that the energy costs of digestion of blood by fleas is dependent on the host species. To test this hypothesis, we studied CO<sub>2</sub> emission, a measure of energy expenditure, during digestion of a blood meal taken by *Parapulex chephrenis* from a preferred (*Acomys cahirinus*) and a non-preferred (*Gerbillus dasyurus*) host. We predicted that the energy cost of digestion would be lower for *A. cahirinus* blood than that for *G. dasyurus*. Male and female fleas consumed similar amounts of blood per unit body mass, independent of host species. Our prediction

was supported in that fleas expended significantly more energy digesting blood of *G. dasyurus* than blood of *A. cahirinus*. We also found CO<sub>2</sub> emission rates of fed fleas were higher than those of unfed fleas and differed significantly among stages of blood digestion when a flea fed on *G. dasyurus* but not when it fed on *A. cahirinus*. When fed on *G. dasyurus*, fleas spent less energy during earlier than later stages of digestion.

Key words: CO<sub>2</sub> emission, digestion, flea, host specificity, metabolic cost, *Acomys cahirinus*, *Gerbillus dasyurus*.

### Introduction

Net nutritive and energetic value of food consumed by an animal depends on a variety of factors including ecological, chemical, morphological and/or physiological constraints of the forager (Lee and Houston, 1993; Brown et al., 1994; Kam et al., 1997; Piersma and Drent, 2003; Johnston et al., 2005). An interplay of cost/benefit evaluations concerning each of these factors and their interactions results in a foraging decision. One of the most important factors affecting a foraging decision is the energetic cost of food processing. Indeed, the cost of food processing in terms of time and/or energetic cost of digestion has been incorporated into many cost/benefit foraging analyses as an important variable (Kersten and Visser, 1996; van Gils et al., 2003; Piersma et al., 2003). Of particular importance is the energetic cost of digestion, as different types of food entail different energy costs.

Cost/benefit analyses for foraging decisions that take into account the energetic outlay for digestion have been done extensively for various vertebrates such as reptiles (Segor and Nagy, 1994), birds (Piersma et al., 2003; van Gils, 2005) and mammals (Williams et al., 2004). However, this is not the case for invertebrates, where only few studies have been made (Beiras and Camacho, 1994; Yang and Joern, 1994).

Furthermore, energetic components of digestive physiology have been examined only rarely in parasitic organisms, although parasites form a large proportion of the diversity of life. Parasitism is suggested to be more common than all other feeding strategies (Sukhdeo and Bansemir, 1996) and parasites supposedly make the same decisions that every animal has to make regarding resource acquisition.

Different aspects of digestive physiology of parasites, especially haematophagous arthropods such as mosquitoes (Pascoa et al., 2002; Briegel, 2003), fleas (Richards and Richards, 1968; Vatschenok et al., 1976) and ticks (Coons et al., 1986; Rechav and Fielden, 1995), have been reported. In particular, different ectoparasitic arthropods have been shown to increase their metabolic rate during blood digestion (Fielden et al., 1999, 2004; Gray and Bradley, 2003). However, the energetic costs of digestion of a food resource (e.g. blood) extracted by a parasite from different hosts have never been studied. These costs would include secretion of enzymes, the metabolism of the blood components, the excretion of the toxic by-products and the heat increment of feeding (see Clements, 1992 for a review).

Differential energy costs of digestion of food obtained by a parasite from different hosts may have important ecological

and evolutionary implications. A lower energy cost for resource processing would allow a parasite to allocate more energy for other competing requirements of an organism (host location, mating, oviposition). This would supposedly increase fitness reward stemming from selection of an appropriate host and, thus, can shape the coevolutionary process between hosts and parasites. At the evolutionary level, differences in the energy cost of digestion of a resource extracted by a parasite from one host species rather than from another host species may reflect specific adaptations of a parasite to exploit successfully a particular host species. Specific adaptations to this host species were favoured by natural selection due to differential fitness rewards between hosts. Thus, energy expended by a parasite to process food obtained from a host may be an indicator of evolutionary success of a parasite in the exploitation of a host species.

We examined energy expenditure, as determined by measurement of CO<sub>2</sub> emission, of the flea *Parapulex chephrenis* Rothschild after feeding on blood of different hosts. Fleas (Siphonaptera) are holometabolous, blood-sucking, ectoparasitic insects that exploit higher vertebrates, being most abundant and diverse on small to medium-sized mammal species (Marshall, 1981). The larvae of fleas are not usually parasitic and feed on organic debris and materials found in the nest of the host. After emergence from the pupa and cocoon, adult fleas must locate a suitable host to complete their life cycle. Fleas vary in the degree of association with their host species from being highly host-specific to being host-opportunistic (Marshall, 1981).

*P. chephrenis* is a highly host-specific parasite associated with the Egyptian spiny mouse *Acomys cahirinus* Wagner (Krasnov et al., 1997). *A. cahirinus* is a specialized rock-dweller that co-exists in rocky habitats with the gerbil *Gerbillus dasyurus* Wagner, from which *P. chephrenis* is absent. When *A. cahirinus* was recorded occasionally in other habitats, it was also parasitized by *P. chephrenis*. Moreover, *P. chephrenis* was able to discriminate between different host species, selecting *A. cahirinus* over *G. dasyurus* in host-choice experiments (Krasnov et al., 2002a). In the laboratory experiments, *P. chephrenis* was shown to be able to survive and reproduce on *G. dasyurus* (Krasnov et al., 2002a). However, the egg production of *P. chephrenis* fed on this host was almost six times less than when it fed on *A. cahirinus* (Krasnov et al., 2002a).

Physical and chemical properties of blood are important characteristics of a host to which a host-specific ectoparasite is expected to be adapted (Marshall, 1981). However, studies of the effect of feeding ectoparasites on different host species are scarce and indirect (e.g. Prasad, 1969). Moreover, in most laboratory studies of the rate of blood digestion, ectoparasitic arthropods were fed on laboratory animals rather than on their natural hosts. For example, wild rodents were used as hosts in only eight of 27 studies on fleas while the others used mainly laboratory mice, rats, hamsters and guinea pigs (cited by Vatschenok, 1988).

We hypothesized that different host species exert different

energetic costs on the digestion of blood by a flea. To test this hypothesis, we studied CO<sub>2</sub> emission during digestion of a single blood meal extracted by a host-specific *P. chephrenis* from a preferred (*A. cahirinus*) and non-preferred (*G. dasyurus*) host. We predicted that the energy costs of digestion would be lower for digesting blood from *A. cahirinus* than blood from *G. dasyurus*.

## Materials and methods

### Animals

Fleas and rodents were obtained from our laboratory colonies. The flea colony was started in 1999 from field-collected specimens of *A. cahirinus*. We used newly emerged fleas that did not feed prior to the experiments.

Progenitors of the rodent colonies were captured at the Ramon erosion cirque, Negev Highlands, Israel (30°35' N, 34°45' E). The rodents were maintained in glass cages (60×50×40 cm) at 25°C with a photoperiod of 12 h:12 h (L:D), using dried grass as bedding material. They were offered millet seeds and alfalfa (*Medicago* sp.) *ad libitum* and commercial cat chow or larvae of flour beetles once a week. No water was available to the rodents as alfalfa supplied enough for their needs. The infestation level of fleas on rodents in our colonies comprised approximately 75% of the natural level of flea infestation (6–8 fleas per rodent; see Krasnov et al., 1997). No adverse effects on body mass and food intake of infested rodents were observed. The experimental protocol met the requirements of the 1994 Law for the Prevention of Cruelty to Animals (Experiments on Animals) of the State of Israel by the Ben-Gurion University Committee for the Ethical Care and Use Animals in Experiments (License IL-19-04-2001). Details on maintenance of fleas and rodents were published elsewhere (Krasnov et al., 2002a, 2003).

### Experimental design

Feeding of fleas on rodents was carried out at a room temperature of 25°C and relative humidity of 70%. We used *A. cahirinus* and *G. dasyurus*; 10 male adults of each species. Each rodent (*A. cahirinus* or *G. dasyurus*) was placed in a wire mesh (5×5 mm) tube (10 cm length and 2 cm diameter) that limited movement and did not allow self-grooming. To avoid the potential effect of acquired resistance (Willadsen, 1980), rodents were subjected to *P. chephrenis* parasitism 3–5 times (once daily) prior to experiments. Each tube with a rodent was placed in an individual white plastic pan, and 20 male or female fleas were placed on each rodent. Fleas were collected after 2 h. Groups of fleas ( $N=5-10$ ) were weighed to the nearest 0.01 mg (Precisa Balance, model 290 SCS; Precisa Instruments AG, Dietikon, Switzerland) prior and after feeding and the difference was calculated as blood consumed. Fleas with high midgut engorgement (see below) only were weighed after feeding.

We assessed the level of flea midgut engorgement by examination of each flea under a light microscope (without

dissection) and by using the following classification: (a) low (less than 30% of midgut is filled with blood); (b) medium (30–70% of midgut is filled with blood); and (c) high (more than 70% of midgut is filled with blood). We selected fleas with high midgut engorgement, weighed them in groups ( $N=5$ ) and placed them individually into 20 ml glass vials covered by a 5×5 cm nylon screen. Then, vials were placed in refrigerated incubators (FOC225E; Velp Scientifica srl, Milano, Italy) and maintained at 25°C and 92% relative humidity.

We measured CO<sub>2</sub> emission in newly emerged, unfed fleas as well as in fed fleas at different stages of blood digestion. Classification of the stages of blood digestion was modified from a classification of Ioff (1941) and has been used in our previous studies (Krasnov et al., 2002b). We distinguished the following stages: (1) early – midgut stretched and fully filled with light scarlet or dark red blood; (2) middle – the contour of the midgut is jagged and the content is dark brown or black; and (3) late – midgut contains only remnants of digested blood or is empty. The duration of each stage of blood digestion in *P. chephrenis* fed on *A. cahirinus* or *G. dasyurus* is reported elsewhere (Krasnov et al., 2003). In brief, the first, second and third stages of digestion of the first blood meal lasted 7–8, 9–10 and 14–15 h, respectively, when a flea fed on *A. cahirinus*, and 8–9, 12–13 and 10–11 h, respectively, on *G. dasyurus*. We measured CO<sub>2</sub> emission after 3, 12 or 24 h post-feeding. Prior to a measurement, we examined the midgut of each flea under light microscopy to verify the blood digestion status. Treatments, therefore, differed in host species (*A. cahirinus* or *G. dasyurus*), flea sex (male or female) and stage of blood digestion (1st, 2nd or 3rd). Each treatment (6–10 fleas) was replicated 10 times, totalling two hosts × two sexes × three stages of digestion × 10 replicates + 10 measurements of CO<sub>2</sub> emission of unfed fleas=130 experiments. Fleas were assigned to different treatments at random.

#### Respirometry

A flow-through respirometry system was used to measure CO<sub>2</sub> emission. Incurrent air was scrubbed of CO<sub>2</sub> and H<sub>2</sub>O vapour by Drierite (700 ml volume) and Ascarite (25 ml volume) columns, respectively, and was pumped through a respirometer chamber made of tygon tubing (6.5 mm internal diameter, 3 ml volume) at a flow rate of 50 ml min<sup>-1</sup>. Flow rate was controlled by a mass flow controller (model FC-260; Tylan, Rancho Dominguez, CA, USA). This dry, CO<sub>2</sub>-free air constituted the baseline measurements for all flow-through measurements. Carbon dioxide content (p.p.m.) of air exiting the respirometer chamber, measured by a CO<sub>2</sub> analyzer (model 6262; LI-COR, Lincoln, NE, USA) in conjunction with data-acquisition software (Datacan V; Sable Systems, Henderson, NV, USA), was sampled every 2 s. Tygon tubing (3.3 mm internal diameter) was used to plumb the system. A stable temperature for the air inside the respirometer tubing (25°C) was regulated by placing the chamber and preceding 6 m of incurrent tygon tubing into a water bath (model 1013S; Fisher Scientific, Pittsburgh, PA, USA). Carbon dioxide emission for

fleas was recorded for 1 h. Baseline measurements were made before and after each recording to determine zero CO<sub>2</sub> and to correct for instrument drift. Fleas were measured in groups ( $N=6–10$ ) since CO<sub>2</sub> emission of individuals was very low and only slightly above baseline levels. Before being placed in the respirometer chamber, groups of fleas were weighed to the nearest 0.01 mg. Details of the protocol as well as details on the repeatability of the measurements can be found elsewhere (Fielden et al., 2004; Krasnov et al., 2004a).

#### Data analysis

The effect of host species and flea sex on the amount of blood consumed by a flea per individual and per unit body mass of unfed flea was analyzed using two-way analysis of covariance (ANCOVA; with body mass as a covariate because of sexual size dimorphism) and two-way analysis of variance (ANOVA), respectively.

All computerized CO<sub>2</sub> emission recordings were processed using the analysis package of Datacan V. Each recording was converted from p.p.m. to  $\mu\text{l CO}_2 \text{ h}^{-1}$ . We analyzed both mass-specific (per unit body mass) and mass-independent metabolic rate of CO<sub>2</sub> emission. Distribution of all dependent variables did not deviate significantly from normal (Kolmogorov–Smirnov’s tests; non-significant), so parametric statistics were applied. We analyzed mass-specific rates of CO<sub>2</sub> emission of fed fleas using three-way ANOVA with host species, flea sex and stage of blood digestion as independent variables. These variables were also used in ANCOVA of mass-independent rate of CO<sub>2</sub> emission with body mass as a covariate (Packard and Boardman, 1999). In addition, we analyzed mass-specific and mass-independent rate of CO<sub>2</sub> emission in newly emerged *versus* adult fleas using one-way ANOVAs and ANCOVAs (with body mass as a covariate), respectively, with flea feeding state (unfed and three stages of digestion) as an independent variable separately for male and female fleas fed on each host species. We used Tukey’s HSD test for multiple comparisons. This test is highly conservative (Winer et al., 1991).

We also calculated mass-specific energy cost of a flea for digestion of 1 mg of blood of *A. cahirinus* or *G. dasyurus* during one hour of the first, second or third digestion stages. We refer to the energy expended to digest 1 mg of blood as specific dynamic effect (SDE), as suggested by Withers (1992). Withers (1992) defined SDE as reflecting ‘...the energetic requirements of many processes that occur as a consequence of food digestion, including mechanical processing, energy exchange through catabolic and anabolic biochemical pathways and amino acid deamination and nitrogen excretion’ (p. 108). First, we calculated the mean volume of CO<sub>2</sub> emitted per hour per mg of body mass of newly emerged unfed fleas (no sexual difference in this parameter was found in *P. chephrenis*; see Results). Then, we used this value to calculate the difference in the mass-specific volume of emitted CO<sub>2</sub> between a digesting flea and that of an unfed flea for each respirometric replicate. Difference in body mass of fleas before and after feeding (reduced to 1 mg of body mass before feeding) was considered to be equal to the mass-specific

Table 1. Mass-specific and mass-independent rates of CO<sub>2</sub> emission in newly emerged male (M) and female (F) unfed and fed *P. chephrenis* fleas at 25°C

| Status | Host      | Sex | Stage of digestion | Body mass (mg) | Rate of CO <sub>2</sub> emission |                                                      |                                        |
|--------|-----------|-----|--------------------|----------------|----------------------------------|------------------------------------------------------|----------------------------------------|
|        |           |     |                    |                | Per flea (µl h <sup>-1</sup> )   | Mass-specific (µl mg <sup>-1</sup> h <sup>-1</sup> ) | Mass-independent (µl h <sup>-1</sup> ) |
| Unfed  | –         | M   | –                  | 0.11±0.01      | 0.07±0.01                        | 0.7±0.04                                             | 0.17±0.07                              |
|        |           | F   | –                  | 0.18±0.04      | 0.15±0.03                        | 0.82±0.15                                            | 0.17±0.05                              |
| Fed    | <i>Ac</i> | M   | 1                  | 0.14±0.01      | 0.19±0.02                        | 1.31±0.11                                            | 0.28±0.05                              |
|        |           |     | 2                  | 0.13±0.01      | 0.14±0.01                        | 1.12±0.09                                            | 0.25±0.03                              |
|        |           |     | 3                  | 0.14±0.01      | 0.19±0.02                        | 1.39±0.17                                            | 0.27±0.08                              |
|        |           | F   | 1                  | 0.24±0.04      | 0.31±0.03                        | 1.29±0.13                                            | 0.27±0.04                              |
|        |           |     | 2                  | 0.31±0.03      | 0.32±0.03                        | 1.20±0.18                                            | 0.20±0.04                              |
|        |           |     | 3                  | 0.26±0.04      | 0.50±0.04                        | 1.98±0.20                                            | 0.44±0.04                              |
|        | <i>Gd</i> | M   | 1                  | 0.11±0.01      | 0.34±0.06                        | 2.44±0.40                                            | 0.44±0.03                              |
|        |           |     | 2                  | 0.18±0.01      | 0.50±0.02                        | 2.60±0.048                                           | 0.56±0.07                              |
|        |           |     | 3                  | 0.90±0.08      | 0.24±0.03                        | 1.50±0.16                                            | 0.28±0.02                              |
|        |           | F   | 1                  | 0.27±0.05      | 1.43±0.31                        | 4.83±0.63                                            | 1.34±0.12                              |
|        |           |     | 2                  | 0.35±0.06      | 0.96±0.14                        | 3.49±0.65                                            | 0.71±0.14                              |
|        |           |     | 3                  | 0.21±0.05      | 0.43±0.04                        | 2.24±0.29                                            | 0.43±0.07                              |

Fed fleas were on either *Acomys cahirinus* (*Ac*) or *Gerbillus dasyurus* (*Gd*) as hosts.

amount of blood consumed. The quotient of mass-specific difference in the volume of emitted CO<sub>2</sub> between digesting and unfed fleas and mass-specific amount of consumed blood was considered as a mass-specific indicator of SDE (energy expended for digestion of 1 mg of blood) during the first, second or third digestion stage. To convert metabolic rate measured as the rate of CO<sub>2</sub> emission to an energy equivalent, we assumed a respiratory quotient (RQ) of 0.8. This was determined previously for unfed females of the tick *Amblyomma marmoreum* by Lighton et al. (1993) and seemed a reasonable assumption for haematophagous arthropods. An RQ of 0.8 gives an energy equivalent of 24.5 J ml<sup>-1</sup> CO<sub>2</sub> (Schmidt-Nielsen, 1990). SDE of a whole flea was calculated in a similar way. These values were used to calculate the energy cost of blood digestion and were analyzed using three-way ANOVA and three-way ANCOVA (with initial body mass as a covariate), respectively, between host species and flea sexes and among digestion stages.

### Results

Male and female *P. chephrenis* consumed similar amounts of blood per unit of unfed body mass, independent of host species (ANOVA,  $F_{1,116}=1.7$  for the effect of sex and  $F_{1,116}=0.7$  for the effect of host species,  $P>0.3$  for both). The same was true for the amount of blood taken by an individual flea when controlling for the confounding effect of body mass (ANCOVA,  $F_{1,115}=2.1$  for the effect of sex and  $F_{1,115}=0.6$  for the effect of host species;  $P>0.1$  for both). During 2 h of feeding, an individual flea consumed an average of 0.43±0.08 mg of *A. cahirinus* blood or 0.63±0.13 mg of *G. dasyurus* blood per mg of unfed body mass.

Mass-specific rate of CO<sub>2</sub> emission of fed fleas was higher than that of unfed fleas (ANOVA; males,  $F_{1,38}=13.9$  if fed on *A. cahirinus* and  $F_{1,38}=12.2$  if fed on *G. dasyurus*; females,  $F_{1,38}=7.2$  if fed on *A. cahirinus* and  $F_{1,38}=16.4$  if fed on *G. dasyurus*;  $P<0.005$  for all; Table 1). The same was true for mass-independent rate of CO<sub>2</sub> emission (ANCOVA with body mass as a covariate; ANOVA; males,  $F_{1,37}=12.7$  if fed on *A. cahirinus* and  $F_{1,37}=6.9$  if fed on *G. dasyurus*; females,  $F_{1,37}=13.8$  if fed on *A. cahirinus* and  $F_{1,37}=4.8$  if fed on *G. dasyurus*;  $P<0.05$  for all; Table 1).

Both mass-specific and mass-independent rates of CO<sub>2</sub> emission differed significantly among stages of blood digestion and were affected significantly by host species and flea sex, being, in general, higher (1) when digesting *G. dasyurus* than *A. cahirinus* blood and (2) in females than in males (Table 2). However, significance of the interaction terms indicated that differences in CO<sub>2</sub> emission among stages of digestion were manifested differently in male and female fleas fed on different hosts. Indeed, mass-specific rate of CO<sub>2</sub> emission did not differ between consecutive stages of blood digestion in both male and female fleas fed on *A. cahirinus* (Tukey's HSD tests;  $P>0.1$  for all; Table 1). By contrast, male and female fleas fed on *G. dasyurus* demonstrated significantly higher mass-specific rates of CO<sub>2</sub> emission during the 1st and 2nd digestion stages than during the 3rd stage (Tukey's HSD tests;  $P<0.05$ ; Table 1). The same was true for mass-independent rates of CO<sub>2</sub> emission (Table 1). In addition, mass-independent rates of CO<sub>2</sub> emission in females fed on *G. dasyurus* were significantly lower during the 2nd digestion stage than the 1st stage (Tukey's HSD tests;  $P<0.05$ ; Table 1).

Mass-specific SDE of fleas showed a significant effect of host species ( $F_{1,108}=58.9$ ;  $P<0.001$ ); fleas expended

Table 2. Summary of ANOVA and ANCOVA (with body mass of a fed flea as a covariate) of mass-specific and mass-independent rates of CO<sub>2</sub> emission, respectively, at different stages (digestion stage factor) of *A. cahirinus* or *G. dasyurus* (host factor) blood digestion by male and female (sex factor)

| <i>P. chephrenis</i> |                              |      |          |
|----------------------|------------------------------|------|----------|
| Analysis             | Effect                       | d.f. | <i>F</i> |
| ANOVA                | Host                         | 1    | 56.5**   |
|                      | Sex                          | 1    | 15.9**   |
|                      | Digestion stage              | 2    | 4.06*    |
|                      | Host × sex                   | 1    | 8.2**    |
|                      | Host × digestion stage       | 2    | 11.6**   |
|                      | Error                        | 108  |          |
| ANCOVA               | Host                         | 1    | 22.8**   |
|                      | Sex                          | 1    | 7.2**    |
|                      | Digestion stage              | 2    | 3.3*     |
|                      | Host × sex                   | 1    | 6.5**    |
|                      | Host × digestion stage       | 2    | 6.3**    |
|                      | Host × sex × digestion stage | 2    | 3.4*     |
| Error                | 109                          |      |          |

Only significant interactions are shown: \* $P < 0.05$ , \*\* $P < 0.001$ .

significantly more energy digesting blood of *G. dasyurus* than blood of *A. cahirinus* (Fig. 1). The difference between digestion stages in SDE was marginally significant ( $F_{2,108}=2.9$ ;  $P=0.06$ ) whereas SDE was similar in males and females ( $F_{1,108}=0.7$ ;  $P>0.3$ ). The only significant interaction was between host species and digestion stage factors ( $F_{2,108}=3.6$ ;  $P<0.03$ ). This was manifested in lower SDE during the third stage of digestion than the second stage for males or the two first stages for females when fleas fed on *G. dasyurus* (Fig. 1).

The ANCOVA of SDE for a whole flea with body mass as a covariate demonstrated a similar trend. In both males and females, mass-independent SDE was affected by host species ( $F_{1,107}=22.5$ ;  $P<0.001$ ), being significantly higher for *G. dasyurus* blood than for *A. cahirinus* blood during the first and second (Tukey's HSD tests;  $P<0.05$ ) stages but not the third stage of digestion (Tukey's HSD tests;  $P>0.05$ ) (Fig. 2). This pattern also explains the significant effect of the digestion stage factor ( $F_{2,107}=3.2$ ;  $P<0.05$ ) as well as the significance of the interactions of host species with digestion stage and a three-way interaction term ( $F_{1-2,107}=3.5-6.4$ ;  $P<0.05$  for both). The effect of flea sex was marginally significant ( $F_{1,107}=3.0$ ;  $P=0.056$ ), whereas interaction between host species and sex was significant ( $F_{1,107}=6.5$ ;  $P<0.01$ ). This, together with significance of the three-way interaction, was manifested in a tendency of females to spend more energy than males during the first stage of digestion of *G. dasyurus* blood (Fig. 2).

## Discussion

Energy costs for blood digestion were lower when a flea fed on its preferred host rather than on a non-preferred (=strange) host and, therefore, our prediction was confirmed. In addition,

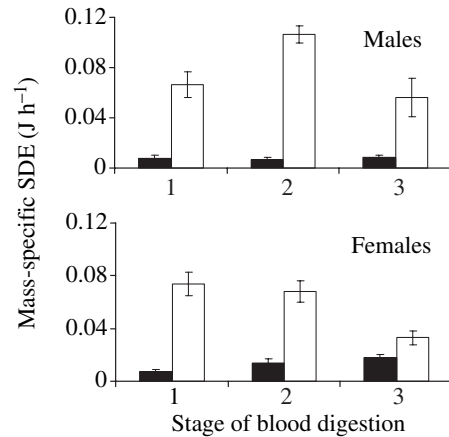

Fig. 1. Mean ( $\pm$  S.E.M.) mass-specific specific dynamic effect (SDE) in *P. chephrenis* digesting blood of *A. cahirinus* (filled columns) or *G. dasyurus* (open columns).

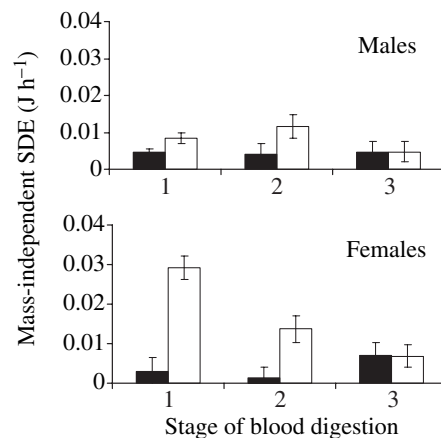

Fig. 2. Mass-independent (adjusted means  $\pm$  S.E.M.) specific dynamic effect (SDE) in *P. chephrenis* digesting blood of *A. cahirinus* (filled columns) or *G. dasyurus* (open columns).

this study demonstrated that (1) consecutive stages of blood digestion had different metabolic costs; (2) blood meals increased the metabolic rates of fleas as measured by CO<sub>2</sub> production; and (3) female fleas tended to spend more energy than males during the earlier stages of blood digestion from a non-preferred host.

### Effect of host species

Besides the lower energy costs of *P. chephrenis* to digest blood of *A. cahirinus* than blood of *G. dasyurus*, it took *P. chephrenis* less time to digest the *A. cahirinus* blood ( $9.1 \pm 0.6$  versus  $15.4 \pm 0.9$  h for the 2nd stage of digestion; Krasnov et al., 2003). This between-host difference in digestion time could be due to between-host variability in the resistance of blood cells (both red and white) to haemolytic activity of the flea digestive system (Vatschenok, 1988). Consequently, a blood meal from *A. cahirinus* would probably produce a higher fitness reward for *P. chephrenis* than a blood meal from *G. dasyurus*. Indeed, a previous study showed that female *P.*

*chephrenis* produced 4–6 times more eggs when fed on *A. cahirinus* than on *G. dasyurus* (Krasnov et al., 2002a). A reduction in egg production and viability for parasites fed on a non-preferred host has been reported for other species. As early as the beginning of the twentieth century, Goeldi (1905) recognized that mosquito egg production was affected by host blood. The rat fleas *Xenopsylla cheopis* and *Xenopsylla astia* failed to reproduce when they fed on humans (Seal and Bhattacharji, 1961), and fecundity and egg hatchability in *X. cheopis* were higher when the fleas fed on *Rattus rattus* than on *Bandicota bengalensis* (Prasad, 1969). Moreover, flea species that are commonly believed to be host opportunistic demonstrate differential reproduction output, dependent on host species. *Xenopsylla conformis* produced three times the number of eggs when exploiting the jird *Meriones crassus* than the gerbil *Gerbillus dasyurus* (Krasnov et al., 2004b).

Differential fitness reward of a haematophagous ectoparasite according to host species suggests that ectoparasites can adapt to feed on blood with host species-specific physiological and biochemical parameters (viscosity, protein, glucose, lipid content). However, little information is available on host blood characteristics that could account for preferences in haematophagous parasites. Host preferences shown by tsetse flies for certain mammals do not appear to be based on the nutritional value of the blood (Moloo et al., 1988), whereas some species of mosquitoes show a preference for human blood over mouse blood based on amino acid composition, specifically isoleucine content (Harrington et al., 2001).

The energy cost of digestion is not the only parameter that determines energetic efficiency of foraging and, ultimately, of host selection by a parasite. Other expenditures associated with foraging activities include searching for the host, feeding site selection for piercing the skin of the host and obtaining a blood meal, time required for a blood meal and surviving anti-parasitic grooming effort of a host. For example, hosts can differ in abundance and spatial distribution and, thus, in their availability for a parasite. The difference in feeding rate of a haematophagous parasite on different hosts could be a result of the morphology of the mouthparts that can penetrate the skin of some hosts but not others (Marshall, 1981). Previous studies on the patterns of flea foraging demonstrated that these costs are usually lower for a preferred host than for other hosts. For example, time from contact with the host to the beginning of feeding, which can be considered the latency of foraging decision, was less in *P. chephrenis* feeding on *A. cahirinus* than on *G. dasyurus* (Krasnov et al., 2003).

#### *Digestion and metabolic rate*

Higher CO<sub>2</sub> emission in fed *versus* unfed fleas supports our previous findings on *Xenopsylla ramesis* that fleas that had a blood meal had significantly higher metabolic rates than newly emerged unfed fleas (Fielden et al., 2004). This difference in energy expenditure is mainly a consequence of the energy costs of consuming, processing and digesting blood by the haematophagous arthropods. In addition, feeding may stimulate some physiological process that causes differential

metabolic responses in starving fed and unfed haematophagous arthropods such as sperm or egg production (Gray and Bradley, 2003).

In fleas fed on *G. dasyurus*, energy costs generally decreased at the third stage of digestion. This decrease of energy expenditure may be associated with the absence of a digestive process *per se* at the third stage of digestion (Vatschenok and Solina, 1969). Indeed, the earlier stages of digestion in fleas include haemolysis and digestion of blood to haematin (the final product of blood digestion; Vatschenok, 1988), whereas the third stage seems to reflect mechanical (release of the undigested remnants and final products) rather than biochemical processes (Vatschenok and Solina, 1969; Brukhanova et al., 1978). The lack of differences in energy cost of different digestion stages in fleas fed on *A. cahirinus* can be related to overall low energy expenditure during this process and, thus, possible undetectability of these differences by our equipment.

#### *Sexual difference*

Female fleas invested more energy for digestion of blood of a non-preferred host than did males. In addition, time required for digestion of *G. dasyurus* blood has been found to be longer in females than in males (Krasnov et al., 2003, but see Vatschenok et al., 1976 for *X. cheopis*). This suggests a strong female-biased sexual difference in the total amount of energy spent for digestion of a blood meal from a non-preferred host.

This difference between sexes can be related to the unpredictability of host finding by a flea and to the association of flea reproduction with blood feeding. Adult fleas alternate periods on the host with periods in the burrow or nest (Ioff, 1941). Since a host may not always return in a regular or predictable manner to its nest or resting area, survival of fleas depends in part on their ability to use other host species. Indeed, female *P. chephrenis* can survive and reproduce when fed on *G. dasyurus*, although its fecundity decreases drastically when exploiting this host (Krasnov et al., 2002a). Furthermore, blood feeding in fleas triggers sperm transfer, mating behaviour, egg maturation and oviposition (Iqbal and Humphries, 1970; Hsu and Wu, 2001; Dean and Meola, 2002). Male fleas are able to mate after a single blood meal (Iqbal and Humphries, 1976), but females of most flea species have to feed repeatedly for their eggs to mature (Vatschenok, 1988). Consequently, the urgency of a blood meal is more critical for females than for males. As a result, females would benefit from investing energy in digesting blood from a strange host, especially given that the location and successful attack of a preferred host is not guaranteed. Another, not necessarily alternative, explanation of the sexual differences in the digestion of blood of a non-preferred host is related to the fact that, during digestion, fleas essentially transform host blood into eggs or sperm. Vitellogenesis or oogenesis may be more energy costly than spermatogenesis, especially when food with biochemical components that differ in some way from that of the specific host is consumed.

We thank N. Burdelova for technical assistance. This study was supported by a research grant from the Ministry of Science, Culture and Sport of Israel (grant no. 01-18-331 to B.R.K., I.S.K. and A.A.D.) and by a research grant from the United States–Israel Binational Science Foundation (grant no. 97-00100 to B.R.K., I.S.K. and L.J.F.). L.G. received financial support from the MASHAV (International Centre for Cooperation) program of Israel Ministry of Foreign Affairs. The experiments comply with the laws of the State of Israel. This is publication no. 180 of the Ramon Science Center and no. 485 of the Mitrani Department of Desert Ecology.

## References

- Beiras, R. and Camacho, A. P. (1994). Influence of food concentration on the physiological energetics and growth of *Ostrea edulis* larvae. *Mar. Biol.* **120**, 427-435.
- Briegel, H. (2003). Physiological basis of mosquito ecology. *J. Vector Ecol.* **28**, 1-11.
- Brown, J. S., Kotler, B. P. and Mitchell, W. M. (1994). Foraging theory, patch use, and the structure of a Negev Desert granivore community. *Ecology* **75**, 2286-2300.
- Brukhanova, L. V., Darskaya, N. F. and Surkova, L. A. (1978). Blood digestion in fleas *Leptopsylla segnis* Schoncher. *Parazitologiya* **12**, 383-386.
- Clements, A. N. (1992). *The Biology of Mosquitoes*. Vol. 1. *Development, Nutrition and Reproduction*. Wallingford, UK: CABI Publishing, UK.
- Coons, L. B., Rosell-Davis, R. and Tarnowski, B. I. (1986). Bloodmeal digestion in ticks. In *Morphology, Physiology and Behavioral Ecology of Ticks* (ed. J. R. Sauer and J. A. Hair), pp. 248-279. Chichester: Ellis Horwood.
- Dean, S. R. and Meola, R. W. (2002). Factors influencing sperm transfer and insemination in cat fleas (Siphonaptera: Pulicidae) fed on an artificial membrane system. *J. Med. Entomol.* **39**, 475-479.
- Fielden, L. J., Jones, R. M., Goldberg, M. and Rechav, Y. (1999). Feeding and respiratory gas exchange in the American dog tick, *Dermacentor variabilis*. *J. Insect Physiol.* **45**, 297-304.
- Fielden, L. J., Krasnov, B. R., Khokhlova, I. S. and Arakelyan, M. S. (2004). Respiratory gas exchange in the desert flea *Xenopsylla ramesis* (Siphonaptera: Pulicidae): Response to temperature and blood-feeding. *Comp. Biochem. Physiol. A* **137**, 557-565.
- Goeldi, E. A. (1905). Os mosquitos do Pará. *Memorias do Museu Goeldi (Paraense)* **4**, 1-154.
- Gray, E. M. and Bradley, T. J. (2003). Metabolic rate in female *Culex tarsalis* (Diptera: Culicidae): age, size, activity and feeding effects. *J. Med. Entomol.* **40**, 903-911.
- Harrington, L. C., Edman, J. D. and Scott, T. W. (2001). Why do female *Aedes aegypti* (Diptera: Culicidae) feed preferentially and frequently on human blood? *J. Med. Entomol.* **38**, 411-422.
- Hsu, M. H. and Wu, W. J. (2001). Off-host observations of mating and postmating behaviors in the cat flea (Siphonaptera: Pulicidae). *J. Med. Entomol.* **38**, 352-360.
- Ioff, I. G. (1941). *Ecology of Fleas in Relevance to Their Medical Importance*. Pyatygorsk, USSR: Pyatygorsk Publishers (in Russian).
- Iqbal, Q. J. and Humphries, D. A. (1970). Temperature as a critical factor in the mating behavior of the rat flea, *Nosopsyllus fasciatus* (Bosc.). *Parasitology* **61**, 375-380.
- Iqbal, Q. J. and Humphries, D. A. (1976). Remating of the rat flea, *Nosopsyllus fasciatus* (Bosc.). *Pakistan J. Zool.* **8**, 39-41.
- Johnston, M., Johnston, D. and Richardson, A. (2005). Digestive capabilities reflect the major food sources in three species of talitrid amphipods. *Comp. Biochem. Physiol. B* **140**, 251-257.
- Kam, M., Khokhlova, I. S. and Degen, A. A. (1997). Granivory and plant selection by desert gerbils of different body size. *Ecology* **78**, 2218-2229.
- Kersten, M. and Visser, W. (1996). The rate of food processing in the oystercatcher: food intake and energy expenditure constrained by a digestive bottleneck. *Funct. Ecol.* **10**, 440-448.
- Krasnov, B. R., Shenbrot, G. I., Medvedev, S. G., Vatschenok, V. S. and Khokhlova, I. S. (1997). Host-habitat relation as an important determinant of spatial distribution of flea assemblages (Siphonaptera) on rodents in the Negev Desert. *Parasitology* **114**, 159-173.
- Krasnov, B. R., Khokhlova, I. S., Oguzoglu, I. and Burdelova, N. V. (2002a). Host discrimination by two desert fleas using an odour cue. *Anim. Behav.* **64**, 33-40.
- Krasnov, B. R., Burdelova, N. V., Shenbrot, G. I. and Khokhlova, I. S. (2002b). Annual cycles of four flea species (Siphonaptera) in the central Negev desert. *Med. Vet. Entomol.* **16**, 266-276.
- Krasnov, B. R., Sarfati, M., Arakelyan, M. S., Khokhlova, I. S., Burdelova, N. V. and Degen, A. A. (2003). Host-specificity and foraging efficiency in blood-sucking parasite: Feeding patterns of a flea *Parapulex chephrenis* on two species of desert rodents. *Parasitol. Res.* **90**, 393-399.
- Krasnov, B. R., Khokhlova, I. S., Burdelov, S. A. and Fielden, L. J. (2004a). Metabolic rate and jumping performance in seven species of desert fleas. *J. Insect Physiol.* **50**, 149-156.
- Krasnov, B. R., Khokhlova, I. S., Burdelova, N. V., Mirzoyan, N. S. and Degen, A. A. (2004b). Fitness consequences of density-dependent host selection in ectoparasites: Testing reproductive patterns predicted by isodar theory in fleas parasitizing rodents. *J. Anim. Ecol.* **73**, 815-820.
- Lee, W. B. and Houston, D. C. (1993). The effect of diet quality on gut anatomy in British voles (Microtinae). *J. Comp. Physiol. B* **163**, 337-339.
- Lighton, J. R. B., Fielden, L. J. and Rechav, Y. (1993). Discontinuous ventilation in a non-insect, the tick *Amblyomma marmoratum* (Acari, Ixodidae): characterization and metabolic modulation. *J. Exp. Biol.* **180**, 229-245.
- Marshall, A. G. (1981). *The Ecology of Ectoparasitic Insects*. London: Academic Press.
- Moloo, S. K., Grootenhuis, J. G., Kar, S. K. and Karstad, L. (1988). Survival and reproductive performance of female *Glossina morsitans* when maintained on the blood of different species of wild mammals. *Med. Vet. Entomol.* **2**, 347-350.
- Packard, G. C. and Boardman, T. J. (1999). The use of percentages and size-specific indices to normalize physiological data for variation in body size: wasted time, wasted effort? *Comp. Biochem. Physiol. A* **122**, 37-44.
- Pascoa, V., Oliveira, P. L., Dansa-Petretski, M., Silva, J. R., Alvarenga, P. H., Jacobs-Lorena, M. and Lemos, F. J. A. (2002). *Aedes aegypti* peritrophic matrix and its interaction with heme during blood digestion. *Insect Biochem. Mol. Biol.* **32**, 517-523.
- Piersma, T. and Drent, J. (2003). Phenotypic flexibility and the evolution of organismal design. *Trends Ecol. Evol.* **18**, 228-233.
- Piersma, T., Dekinga, A., van Gils, J. A., Achterkamp, B. and Visser, G. H. (2003). Cost-benefit analysis of mollusc eating in a shorebird. I. Foraging and processing costs estimated by the doubly labelled water method. *J. Exp. Biol.* **206**, 3361-3368.
- Prasad, R. S. (1969). Influence of host on fecundity of the Indian rat flea, *Xenopsylla cheopis* (Roths.). *J. Med. Entomol.* **6**, 443-447.
- Rechav, Y. and Fielden, L. J. (1995). The effect of host resistance on the metabolic rate of engorged females of *Rhipicephalus evertsi evertsi* (Acari: Ixodidae). *Med. Vet. Entomol.* **9**, 289-292.
- Richards, A. G. and Richards, P. A. (1968). Fleas *Ctenophthalmus*: heterogeneous hexagonally arranged layer in the midgut. *Science* **160**, 423-425.
- Schmidt-Nielsen, K. (1990). *Animal Physiology: Adaptation and Environment*, 4th edn. Cambridge, UK: Cambridge University Press.
- Seal, S. C. and Bhattacharji, L. M. (1961). Epidemiological studies of plague in Calcutta, Part 1. Bionomics of two species of rat fleas and distribution, densities and resistance of rodents in relation to the epidemiology of plague in Calcutta. *Indian J. Med. Res.* **49**, 974-1007.
- Segor, S. M. and Nagy, K. A. (1994). Bioenergetic correlates of foraging mode for the snakes *Crotalus cerastes* and *Masticophis flagellum*. *Ecology* **75**, 1600-1614.
- Sukhdeo, M. V. K. and Bansemir, A. D. (1996). Critical resources that influence habitat selection decisions by gastrointestinal helminth parasites. *Int. J. Parasitol.* **26**, 483-498.
- van Gils, J. A., Schenk, I. W., Bos, O. and Piersma, T. (2003). Incompletely informed shorebirds that face a digestive constraint maximize net energy gain when exploiting patches. *Amer. Nat.* **161**, 777-793.
- van Gils, J. A., Dekinga, A., Spaans, B., Wahl, W. K. and Piersma, T. (2005). Digestive bottleneck affects foraging decisions in red knots *Calidris canutus*. II. Patch choice and length of working day. *J. Anim. Ecol.* **74**, 120-130.

- Vatschenok, V. S.** (1988). *Fleas – Vectors of Pathogens Causing Diseases in Humans and Animals*. Leningrad, USSR: Nauka Publishing House (in Russian).
- Vatschenok, V. S. and Solina, L. T.** (1969). Digestion in fleas *Xenopsylla cheopis* Roths. (Aphaniptera, Pulicidae). *Parazitologiya* **3**, 451-460 (in Russian).
- Vatschenok, V. S., Solina, L. T. and Zhirnov, A. E.** (1976). Characteristics of the digestion of the blood from different animals in fleas *Xenopsylla cheopis*. *Parazitologiya* **10**, 544-549 (in Russian).
- Willadsen, P.** (1980). Immunity to ticks. *Adv. Parasitol.* **18**, 293-313.
- Williams, T. M., Fuiman, L. A., Horning, M. and Davis, R. W.** (2004). The cost of foraging by a marine predator, the Weddell seal *Leptonychotes weddellii*: pricing by the stroke. *J. Exp. Biol.* **207**, 973-982.
- Winer, B. J., Brown, D. R. and Michels, K. M.** (1991). *Statistical Principles in Experimental Design*. 3rd edn. New York: McGraw-Hill.
- Withers, P. C.** (1992). *Comparative Animal Physiology*. Fort Worth: Saunders College Publishing.
- Yang, Y. L. and Joern, A.** (1994). Influence of diet quality, developmental stage, and temperature on food residence time in the grasshopper *Melanoplus differentialis*. *Physiol. Zool.* **67**, 598-616.
